# Supplementary material
Source: PubMed Central journal article supplement (PMC1488922)
Supplement: plntcell_tpc.106.041335_1.pdf [file plntcell_tpc.106.041335_1.pdf]

**A** Hv Ta Zm Po Os Sc As At Nt

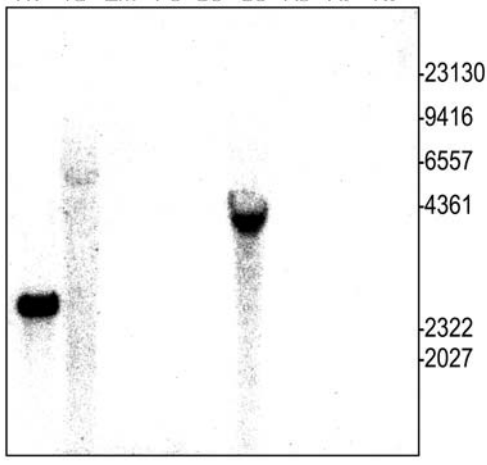

**B**

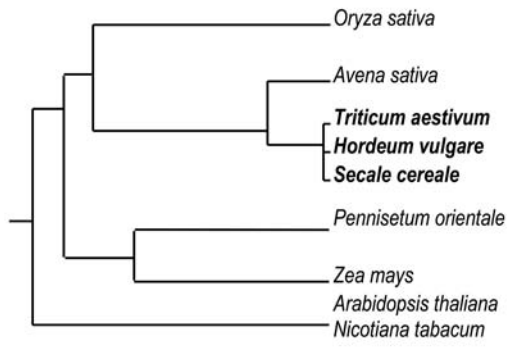

**C**

```

Jek 1 MAARGGKALVLAMLISFLAVQGTG-DLHKFCGCGYTKCMKQTAG---HDACVKQCMNPHGKCFFG-CRR-KSTPS
TJ1 1 MAARTGKALALAMLISFLVVGTTGKLTANCYCVFYNWC FNIGPKPRDHLCMEKSLK---HCFKG-CPRTATTPY
TJ2 1 MAARGGKALVLAMLISFLAVQGTGSDFAACYCHHNKVCTKQWP--RKPVYCMKKSLE---DCTGWTC--SKKPPS
Cons. MAARGGKAL LAMLISFLAVQGTG C C C C C C C P

Jek 71 MMALADHVNPDRDEDTMTVAAEGADHGKFNVTGSMAPVAGGADHGEFNVTEGSMALAGGCRSRRVQCR
TaJ1 73 VTPLADLVNPVTDERSMAVPAGGADHGEFHITGSEVAPAGGADHGEFNAAEEDAAP
TaJ2 70 VMPLADAVNPVTEGSMAPVAGGADHGEFNITEGSMAPAGGADHGDFNTAEEDAAP
Cons. LAD VNP DE M V A GADHG F TEGS APAGGADHG FN E A
  
```
