# Supplementary material
Source: PubMed Central journal article supplement (PMC1488922)

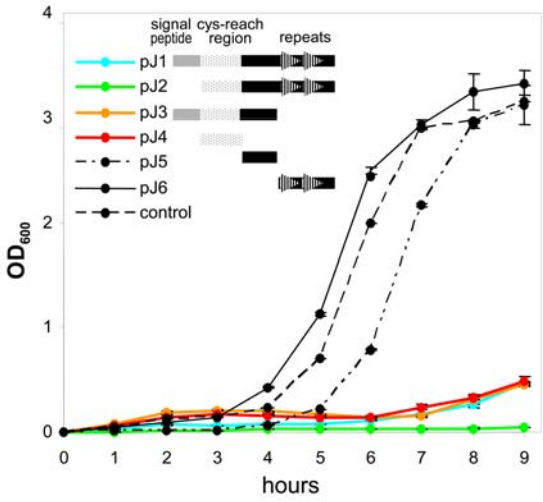

Supplement: plntcell_tpc.106.041335_2.pdf [file plntcell_tpc.106.041335_2.pdf]

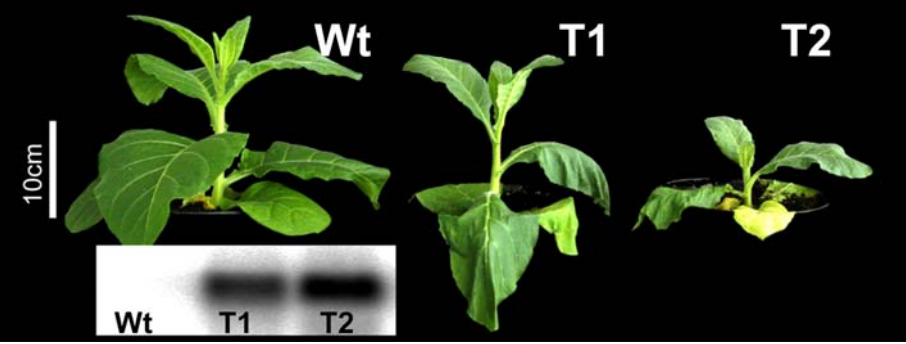

Supplement: plntcell_tpc.106.041335_3.pdf [file plntcell_tpc.106.041335_3.pdf]
